# Supplementary material
Source: publisher figshare collection journal article supplement (https://acs.figshare.com/ndownloader/files/4622638)
Supplement: Supplementary file 1 [file 4622638]

# **Stereoselective Bio-reduction of Bulky-bulky Ketones by a Novel ADH from *Ralstonia* sp.**

Iván Lavandera, Alexander Kern, Bianca Ferreira-Silva, Anton Glieder, Stefaan de  
Wildeman, and Wolfgang Kroutil\*

## **Supporting Information**

### **Table of Contents**

1. Gene library, sequencing, cloning and expression of *Ralstonia* sp. ADH
2. Measurement of activities and 60 mg scale
3. Analytics
4. References

## 1. Gene library, sequencing, cloning and expression of *Ralstonia* sp. ADH

### 1.1. Construction and screening of a *Ralstonia* sp. gene library

Standard molecular-biology procedures were performed according to literature.<sup>1</sup> Genomic bacterial DNA from *Ralstonia* sp. DSM 6428 was partially restricted with *Bsp*143I (*Sau* 3AI). DNA Fragments from 5-8 kb in size were isolated and ligated into the plasmid pBSII (SK<sup>-</sup>). Transformation of *E. coli* Top 10F' (Invitrogen) with the resulting library was performed by electroporation.

Cells were grown for two days at room temperature on LB plates containing 100 µg mL<sup>-1</sup> ampicillin (LB-amp) and 0.2 mM IPTG. The colonies were transferred to a filter and screened for increased NADPH fluorescence<sup>2</sup> due to oxidation of the substrate 1-phenyl-1-propanol in the presence of NADP<sup>+</sup>. 1-Phenyl-1-propanol was added to the cells as a 1% v v<sup>-1</sup> solution dissolved in 5% v v<sup>-1</sup> *N,N*-dimethylformamide in 50 mM Tris-HCl, pH 7.5. Positive clones were analyzed in a subsequent step using the 'substrate-' or the 'enzyme-coupled' approach assay.

### 1.2. Subcloning and expression of a *Ralstonia* sp. ADH gene

Plasmid DNA from positive clones was sequenced. The gathered sequences were analyzed by blastx for putative alcohol dehydrogenases or related genes. A putative short-chain dehydrogenase/alcohol dehydrogenase gene was amplified by PCR and cloned into the pMS470<sup>3</sup> based plasmid pEamTA (Figure S1).<sup>4</sup> The primers were ADH-f 5'-ATGTATCGACTATTAAACAAAACAGC-3' and ADH-r 5'-TTAGACCTGGGTCAATCCACCGTCC-3'. The resulting plasmid pEam\_RasADH was used to transform *E. coli* DH5α. The resulting strain was arbitrarily designated as *E. coli*/RasADH.

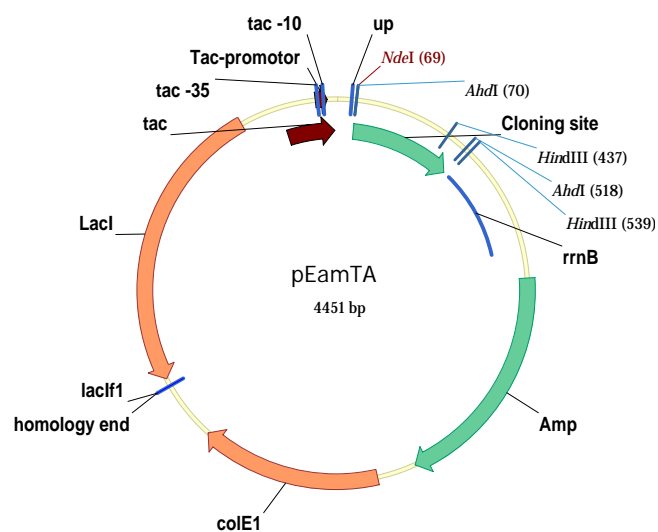

**Figure S1.** Plasmid containing the RasADH gene

### 1.3. Protein sequence

MYRLLNKTAVITGGNSGIGLATAKRFVAEGAYVFIVGRRRKELEQAAAEIGRNVTAVK  
 ADVTKLEDLDRLYAIVREQRGSIDVLFANSGAIEQKTLEEITPEHYDRTFDVNVRLIFTV  
 QKALPLLRDGGSVILTSSVAGVLGLQAHDITYSAAKAAVRSLARTWTTTELKGRSIRVNAV  
 SPGAIDTPIIENQVSTQEEADELRAKFAAATPLGRVGRPEELAAAVLFLASDDSSYVAGIE  
 LFVDGGLTQV.

### 1.4 Gene sequence

Accession number: EU485985

atgtatcgactattaacaaaacagccgcataaccggtggaacacagcgccattggcctcgccacagcgaagcgcttcgttgccgaggg  
 tgcctatgtattcattgtcggtcgccggcggaaggaactcgagcaggcggccgcagaaatcggtcggaatgtcacggcggtcaaagccga  
 tgtgacaaagcttgaagacctggaccgactttacgcgattgtgcgtgagcaacggggtagcatcgacgtactatttgcgaattccggcgcaat  
 cgagcaaaagacgcttgaggagattactccggaacactatgacaggactttcgatgtcaacgttcggggattgatcttcaccgtgcagaagg

cacttcctctgctgcgagacggcggcagcgtgacatctgacaagctcggtagccggcgctcctaggattacaggcgacgacacgtatagtc  
cgccaaggcagcggttaaggctcgctcgaggacatggaccactgagttgaaaggctcgagcattcgtgtcaacgcggttaagcccagggg  
cgatcgacacgcctatcatagaaaaccaggtctctacacaggaagaagctgacgagctgcgtgcgaaattgcagctgcgacgcccctgg  
gtcgcgtcggacgacctgaagagctggcagcgccgtgtatttcttgcacgacgacagtagctacgtagccggcattgagctgtttgtg  
gacggtggattgaccaggtctaa

### *1.5. Preparation of lyophilized cells containing recombinant catalyst E.coli/RasADH*

Cultivation medium LB-amp: Luria broth (25 g L<sup>-1</sup>, Sigma L-3522), ampicillin sodium salt (100 mg L<sup>-1</sup>, Sigma A9518-5G), KH<sub>2</sub>PO<sub>4</sub> (1.4 g L<sup>-1</sup>, Fluka 60220), and K<sub>2</sub>HPO<sub>4</sub> (4.4 g L<sup>-1</sup>, Fluka 60355).

*E. coli*/RasADH was stored at -86 °C in a glycerol/LB-amp 15:85 solution. Prior to use it was plated on LB-amp, then a single colony was plated again on LB-amp (16 h, 37 °C), and finally a loop of cells were used to inoculate 250 mL of LB-amp medium in one liter baffled shake flasks. After incubation for 24 hours at 30 °C at 130 rpm an OD of ~5 was reached and the expression of the ADH was induced by the addition of IPTG (450 mg L<sup>-1</sup>, 2 mM final concentration, preqlab Biotechnologie GmbH 37-2020) and again, ampicillin sodium salt (100 mg L<sup>-1</sup>). The incubation was performed at 20 °C to avoid the formation of inclusion bodies for 24 hours at 130 rpm. The cells were harvested by centrifugation (8000 rpm, 3000 g, 20 min, 4 °C), the medium was decanted and the cells were resuspended in water, shock-frozen (liquid nitrogen) and lyophilized.

## 2. Measurement of activities

### 2.1. 'Enzyme-coupled' approach

Lyophilized cells of *E. coli*/RasADH (10 mg) were rehydrated in Tris-HCl buffer (600  $\mu$ L, 50 mM, pH 7.5, 1 mM NADPH) for 30 min at 30 °C and 120 rpm on a rotary shaker in an Eppendorf vial (1.5 mL). Then, the corresponding ketone (20 g L<sup>-1</sup>), glucose (5 equiv.), and GDH (1 U) were added. Reactions were shaken at 30 °C and 120 rpm for 30 min to ensure low conversions and stopped by extraction with ethyl acetate (2 x 0.5 mL). The organic layer was separated from the cells by centrifugation (2 min, 13000 rpm) and dried (Na<sub>2</sub>SO<sub>4</sub>). Conversions were determined via the standard media of three measurements using GC analysis.

### 2.2. 'Substrate-coupled' approach.

Lyophilized cells of *E. coli*/RasADH (10 mg) were rehydrated in Tris-HCl buffer (600  $\mu$ L, 50 mM, pH 7.5, 1 mM NADPH) for 30 min at 30 °C and 120 rpm on a rotary shaker in an Eppendorf vial (1.5 mL). Then, 2-propanol (67  $\mu$ L, 10% v v<sup>-1</sup>) and the corresponding ketone (20 g L<sup>-1</sup>) were added. Reactions were shaken at 30 °C and 120 rpm for 30 min to ensure low conversions and stopped by extraction with ethyl acetate (2 x 0.5 mL). The organic layer was separated from the cells by centrifugation (2 min, 13000 rpm) and dried (Na<sub>2</sub>SO<sub>4</sub>). Conversions were determined via the standard media of three measurements using GC analysis.

### 2.3 Preparative reduction of $\omega$ -chloroacetophenone **12a**

Lyophilized cells of *E.coli*/RasADH (230 mg) were rehydrated in Tris-HCl buffer (6 mL, 50 mM, pH 7.5, 1 mM NADPH) for 30 min at 30°C and 150 rpm on a rotary shaker in a Falcon tube (50 mL) in horizontal position.  $\omega$ -Chloroacetophenone **12a** (59.6 mg, 45  $\mu$ L, 0.39 mmol), glucose

(5 equiv.) and GDH (6 U) were added. The reaction was shaken at 30°C and 150 rpm for 24 h and stopped by extraction with ethyl acetate (2 x 5 mL). The organic layer was separated from the cells by centrifugation (2 min, 13000 rpm) and dried (Na<sub>2</sub>SO<sub>4</sub>). After analysis of the conversion the organic solvent was evaporated under reduced pressure to yield 55 mg (91%) of optically pure (*R*)-alcohol (*e.e.* >99%).

### 3. Analytics

#### 3.1. GC Analyses for determination of conversions

The following column was used: Chrompack Chirasil Dex (25 m x 0.32 mm x 0.25  $\mu$ m, 1.0 bar H<sub>2</sub>).

**Table S1.** Determination of conversions by GC.

| Compound  | Program <sup>a</sup>     | Retention time (min) |                  |
|-----------|--------------------------|----------------------|------------------|
|           |                          | Ketone <b>a</b>      | Alcohol <b>b</b> |
| <b>1</b>  | 80/6.5/10/160/10         | 11.7                 | 13.9             |
| <b>2</b>  | 80/6.5/10/160/10         | 13.2                 | 15.0             |
| <b>3</b>  | 80/6.5/10/160/10         | 14.5                 | 16.6             |
| <b>4</b>  | 80/6.5/10/160/10         | 12.1                 | 14.0             |
| <b>5</b>  | 80/6.5/10/160/10         | 16.0                 | 17.3             |
| <b>6</b>  | 80/6.5/10/160/10         | 14.6                 | 16.0             |
| <b>7</b>  | 70/0/9/160/4             | 4.7                  | 6.7              |
| <b>8</b>  | 110/0/2.5/120/0/10/200/1 | 1.8                  | 2.5              |
| <b>9</b>  | 110/0/2.5/120/0/10/200/1 | 1.7                  | 2.4              |
| <b>10</b> | 110/0/2.5/120/0/10/200/1 | 2.4                  | 3.5              |
| <b>11</b> | 80/6.5/10/160/10         | 10.1                 | 12.7             |
| <b>12</b> | 110/0/2.5/120/0/10/200/1 | 6.8                  | 8.0              |
| <b>13</b> | 110/0/2.5/120/0/10/200/1 | 3.7                  | 5.4              |

<sup>a</sup> Program: initial temp. (°C)/ time (min)/ slope (°C/min)/ temp. (°C)/ time (min)/ slope (°C/min)/ temp. (°C)/ time (min).

### 3.2. GC analyses for determination of *e.e.*

The following chiral GC column was used: Chrompack Chirasil Dex (25 m x 0.32 mm x 0.25  $\mu$ m, 10 psi H<sub>2</sub>).

**Table S2.** Determination of *e.e.* values by GC.

| Compound <sup>a</sup> | Program <sup>b</sup>     | Retention time (min)                 |
|-----------------------|--------------------------|--------------------------------------|
| <b>4b</b>             | 95/20/5/160/0/10/180/1   | 26.2 ( <i>R</i> ), 26.4 ( <i>S</i> ) |
| <b>5b<sup>c</sup></b> | 100/2/1/130/5/20/170/5   | 36.8 ( <i>R</i> ), 38.0 ( <i>S</i> ) |
| <b>6b</b>             | 80/6.5/10/160/10         | 15.0 ( <i>S</i> ), 15.2 ( <i>R</i> ) |
| <b>7b</b>             | 110/0/2.5/120/0/10/200/1 | 3.6 ( <i>S</i> ), 4.0 ( <i>R</i> )   |
| <b>8b</b>             | 110/0/2.5/120/0/10/200/1 | 2.4 ( <i>S</i> ), 2.6 ( <i>R</i> )   |
| <b>9b</b>             | 110/0/2.5/120/0/10/200/1 | 2.2 ( <i>S</i> ), 2.4 ( <i>R</i> )   |
| <b>10b</b>            | 110/0/2.5/120/0/10/200/1 | 3.2 ( <i>S</i> ), 3.4 ( <i>R</i> )   |
| <b>11b</b>            | 110/0/2.5/120/0/10/200/1 | 5.0 ( <i>S</i> ), 5.3 ( <i>R</i> )   |
| <b>12b</b>            | 110/0/2.5/120/0/10/200/1 | 6.9 ( <i>R</i> ), 7.1 ( <i>S</i> )   |
| <b>13b</b>            | 110/0/2.5/120/0/10/200/1 | 5.9 ( <i>R</i> ), 6.1 ( <i>S</i> )   |

<sup>a</sup> Enantiomeric excesses determined of the corresponding acetate derivatives except otherwise stated. <sup>b</sup> Program: initial temp. (°C)/ time (min)/ slope (°C/min)/ temp. (°C)/ time (min)/ slope (°C/min)/ temp. (°C)/ time (min). <sup>c</sup> Measured as underivatized alcohol.



### 3.3. HPLC analyses for determination of *e.e.*

Column: Chiralpak OD-H (0.46 cm x 25 cm, Daicel Chemical Ind. Ltd.); isocratic eluent: *n*-heptane/*i*-propanol/ (98/2), 18 °C, flow 1.0 mL min<sup>-1</sup>. Enantiomeric excesses determined of the corresponding acetate derivatives.

Retention times (min): **1b**: 4.7 (*R*), 5.2 (*S*).

**2b**: 4.6 (*R*), 4.9 (*S*).

**3b**: 4.5 (*R*), 4.7 (*S*).

## 4. References

- 1 Ausubel, F. M.; Brent, R.; Kingston, R. E.; Moore, D. D.; Seidmann, J. G.; Smith, J. A.; Struhl, K. *Current Protocols in Molecular Biology*, Chanda, V. B. Ed.; Wiley: New York, **1987**.
- 2 Reisinger, C.; van Assema, F.; Schürmann, M.; Hussain, Z.; Remler, P.; Schwab, H. *J. Mol. Catal. B: Enzym.* **2006**, *39*, 149-155.
- 3 Balzer, D.; Ziegelin, G.; Pansegrau, W.; Kruft, V.; Lanka, E. *Nucleic Acids Res.* **1992**, *20*, 1851-1858.
- 4 Reisinger, C.; Kern, A.; Fesko, K.; Schwab, H. *Appl. Microbiol. Biotechnol.* **2007**, *77*, 241-244.
